# Supplementary material for: Structural, Electronic and Nonlinear Optical Properties of Novel Derivatives of 9,12-Diiodo-1,2-dicarba-closo-dodecaborane: Density Functional Theory Approach
Source: publisher site journal article supplement (doi:10.1515/zna-2018-0123), 2018-07-03
Supplement: Supplementary file 1 [file zna-2018-0123_suppl.zip]

## Supporting Information

### Structural, Electronic and Nonlinear Optical Properties of Novel Derivatives of 9,12-diido-1,2-dicarba-closo-dodecaborane: Density Functional Theory Approach

Aijaz Rasool Chaudhry<sup>a,\*</sup>, Shabbir Muhammad<sup>b,c</sup>, Ahmad Irfan<sup>c,d</sup>, Abdullah G. Al- Sehemi<sup>c,d</sup>, Bakhtiar Ul Haq<sup>b,c</sup>, Sajjad Hussain<sup>e</sup>

<sup>a</sup> Deanship of Scientific Research, University of Bisha, Bisha 61922, P.O. Box 551, Saudi Arabia

<sup>b</sup> Department of Physics, College of Science, King Khalid University, Abha 61413, P.O. Box 9004, Saudi Arabia

<sup>c</sup> Research Center for Advanced Materials Science (RCAMS), King Khalid University, Abha 61413, P.O. Box 9004, Saudi Arabia

<sup>d</sup> Department of Chemistry, Faculty of Science, King Khalid University, Abha 61413, P.O. Box 9004, Saudi Arabia

<sup>e</sup> Henan Key Laboratory of Boron Chemistry and Advanced Energy Materials, School of Chemistry and Chemical Engineering, Henan Normal University, Xinxiang, 453007, China

**Table S1.** The calculated values of first hyperpolarizabilities ( $\beta_{\text{tot}}$ , and  $\beta_{\text{vec}}$  a. u.)<sup>a</sup> for compounds **1-3** at B3LYP and CAM-B3LYP/Gen<sup>b</sup> levels of theory

| Compounds | Hyperpolarizability  | B3LYP<br>6-31G** | CAM-B3LYP<br>6-31+G** | Diff. | % Diff. |
|-----------|----------------------|------------------|-----------------------|-------|---------|
| <b>1</b>  | $\beta_{\text{tot}}$ | 827              | 562                   | 265   | 32      |
|           | $\beta_{\text{vec}}$ | 496              | 337                   | 159   | 32      |
| <b>2</b>  | $\beta_{\text{tot}}$ | 6391             | 3160                  | 3231  | 50      |
|           | $\beta_{\text{vec}}$ | 4808             | 1896                  | 2912  | 60      |
| <b>3</b>  | $\beta_{\text{tot}}$ | 6789             | 5773                  | 1016  | 14      |
|           | $\beta_{\text{vec}}$ | 4074             | 3464                  | 610   | 14      |

<sup>a</sup> Conversion factors for  $\beta_{\text{tot}}$  from a.u. to SI and esu units: 1 a. u. =  $3.26361 \times 10^{-53} \text{C}^3 \text{m}^2 \text{J}^{-2}$  =  $8.639418 \times 10^{-33}$  esu

<sup>b</sup> Gen = LANL2DZ for I atoms.

\* corresponding Authors, Tel.: +966 17 623 8450  
e-mail addresses: [archaudhry@ub.edu.sa](mailto:archaudhry@ub.edu.sa) (Aijaz Rasool Chaudhry)

**Table S2:** Optimized geometries of the molecules (Cartesian coordinates) of ground state for compounds **1** at the B3LYP/Gen<sup>b</sup> and CAM-B3LYP/Gen<sup>c</sup> methods levels of theory

| B3LYP/6-31G** |             |             |             | CAM-B3LYP/6-31+G** |             |             |             |
|---------------|-------------|-------------|-------------|--------------------|-------------|-------------|-------------|
| I             | -2.12915800 | -1.35435900 | -0.00000700 | I                  | -2.10703800 | -1.34544300 | -0.00000200 |
| I             | 2.13043100  | -1.35239300 | -0.00000100 | I                  | 2.10717100  | -1.34523600 | 0.00000000  |
| C             | -0.81435800 | 3.19851900  | 0.00013800  | C                  | -0.80729800 | 3.18012900  | 0.00006800  |
| H             | -1.29611500 | 4.16787800  | 0.00021200  | H                  | -1.28890400 | 4.14889600  | 0.00011000  |
| C             | 0.81138100  | 3.19926800  | 0.00001600  | C                  | 0.80700600  | 3.18019700  | 0.00001800  |
| H             | 1.29223000  | 4.16907900  | -0.00005800 | H                  | 1.28852800  | 4.14900500  | 0.00000600  |
| B             | -0.00120100 | 2.77842900  | 1.45473800  | B                  | -0.00007700 | 2.76312900  | 1.44671400  |
| H             | -0.00153100 | 3.56271100  | 2.33600300  | H                  | -0.00009000 | 3.54725700  | 2.32723900  |
| B             | -1.44063300 | 1.89944400  | 0.89461900  | B                  | -1.43258000 | 1.88890400  | 0.88947800  |
| H             | -2.45465800 | 2.05217400  | 1.48000800  | H                  | -2.44671700 | 2.04110100  | 1.47364600  |
| B             | -1.44064600 | 1.89951300  | -0.89441900 | B                  | -1.43261500 | 1.88894500  | -0.88937000 |
| H             | -2.45471100 | 2.05238800  | -1.47971500 | H                  | -2.44678700 | 2.04121400  | -1.47346400 |
| B             | -0.00140500 | 2.77861200  | -1.45458000 | B                  | -0.00018200 | 2.76322900  | -1.44664700 |
| H             | -0.00181500 | 3.56294800  | -2.33579600 | H                  | -0.00023700 | 3.54739000  | -2.32714200 |
| B             | 1.43892600  | 1.90073600  | 0.89441300  | B                  | 1.43244000  | 1.88901600  | 0.88937000  |
| H             | 2.45289900  | 2.05435000  | 1.47966600  | H                  | 2.44661100  | 2.04128000  | 1.47346300  |
| B             | -0.00036900 | 1.01368400  | 1.45836400  | B                  | -0.00000100 | 1.00672400  | 1.45068300  |
| H             | -0.00004200 | 0.41318200  | 2.47608800  | H                  | 0.00005200  | 0.40471800  | 2.46712800  |
| B             | -0.89414200 | 0.46384500  | -0.00001400 | B                  | -0.88863400 | 0.45973500  | -0.00001400 |
| B             | -0.00059000 | 1.01389600  | -1.45841700 | B                  | -0.00011200 | 1.00682100  | -1.45073300 |
| H             | -0.00035000 | 0.41356800  | -2.47625300 | H                  | -0.00011600 | 0.40491000  | -2.46723600 |
| B             | 1.43879800  | 1.90085500  | -0.89461600 | B                  | 1.43238100  | 1.88906900  | -0.88947600 |
| H             | 2.45264300  | 2.05468000  | -1.48003800 | H                  | 2.44649400  | 2.04142500  | -1.47364700 |
| B             | 0.89363400  | 0.46461900  | -0.00021000 | B                  | 0.88855600  | 0.45979500  | -0.00010300 |

<sup>b</sup>Gen = 6-31G\*\* for H, C, B and O atoms, while Gen = LANL2DZ for I atoms

<sup>c</sup>Gen = 6-31+G\*\* for H, C, B and O atoms, while Gen = LANL2DZ for I atoms

**Table S3:** Optimized geometries of the molecules (Cartesian coordinates) of ground state for compound **2** at the B3LYP/Gen<sup>b</sup> at B3LYP and CAM-B3LYP/Gen<sup>c</sup> methods levels of theory, respectively.

| B3LYP/6-31G** |             |             |             | CAM-B3LYP/6-31+G** |             |             |             |
|---------------|-------------|-------------|-------------|--------------------|-------------|-------------|-------------|
| I             | -5.20437100 | 2.12696000  | 0.01819400  | I                  | -5.18288300 | -2.10585300 | -0.01981100 |
| I             | -5.20428200 | -2.12700500 | -0.01822700 | I                  | -5.18287500 | 2.10585800  | 0.01977100  |
| C             | -0.62860500 | 0.87365100  | 0.00800300  | C                  | -0.63311900 | -0.84296800 | -0.00841600 |
| C             | -0.62856300 | -0.87350600 | -0.00813700 | C                  | -0.63311600 | 0.84295400  | 0.00849400  |
| B             | -1.06607800 | -0.01193500 | 1.43812800  | B                  | -1.07393000 | 0.01338200  | -1.44137400 |
| H             | -0.29582200 | -0.01993100 | 2.32952500  | H                  | -0.29617000 | 0.02210400  | -2.32489500 |
| B             | -1.95994900 | 1.43799000  | 0.90840500  | B                  | -1.95460800 | -1.42701300 | -0.90356200 |
| H             | -1.81449800 | 2.43699900  | 1.51949800  | H                  | -1.80154800 | -2.42952200 | -1.50531900 |
| B             | -1.95887400 | 1.45312000  | -0.88303700 | B                  | -1.95378500 | -1.44367600 | 0.87577900  |
| H             | -1.81363200 | 2.46257800  | -1.47683900 | H                  | -1.80094000 | -2.45751600 | 1.45838500  |
| B             | -1.06610600 | 0.01206900  | -1.43822300 | B                  | -1.07396700 | -0.01339400 | 1.44144100  |
| H             | -0.29589400 | 0.02008300  | -2.32966000 | H                  | -0.29623000 | -0.02212000 | 2.32498100  |
| B             | -1.95876800 | -1.45301000 | 0.88295500  | B                  | -1.95375600 | 1.44366700  | -0.87573600 |
| H             | -1.81349700 | -2.46244700 | 1.47678700  | H                  | -1.80089100 | 2.45750700  | -1.45833800 |
| B             | -2.83127400 | -0.01260100 | 1.45324900  | B                  | -2.82764500 | 0.01383900  | -1.44577900 |
| H             | -3.42225400 | -0.02185000 | 2.47654300  | H                  | -3.42198300 | 0.02393400  | -2.46658600 |
| B             | -3.39045400 | 0.89247200  | 0.00757700  | B                  | -3.38040200 | -0.88850500 | -0.00840300 |
| B             | -2.83131200 | 0.01265700  | -1.45330600 | B                  | -2.82768300 | -0.01384300 | 1.44579900  |
| H             | -3.42231000 | 0.02187900  | -2.47659000 | H                  | -3.42204800 | -0.02393700 | 2.46659100  |
| B             | -1.95991800 | -1.43792100 | -0.90848500 | B                  | -1.95462500 | 1.42700400  | 0.90360600  |
| H             | -1.81446000 | -2.43694700 | -1.51954500 | H                  | -1.80157700 | 2.42951300  | 1.50536600  |
| B             | -3.39041300 | -0.89245000 | -0.00762600 | B                  | -3.38039800 | 0.88850300  | 0.00840900  |
| C             | 0.63493500  | 1.53504900  | 0.01376500  | C                  | 0.63325100  | -1.51281300 | -0.01449400 |
| C             | 0.63500800  | -1.53484400 | -0.01385900 | C                  | 0.63325700  | 1.51279400  | 0.01460500  |
| C             | 1.70236800  | 2.11004800  | 0.01951000  | C                  | 1.69246400  | -2.08769400 | -0.01943000 |
| C             | 1.70243600  | -2.10985200 | -0.01959100 | C                  | 1.69247000  | 2.08767300  | 0.01955700  |
| C             | 2.95401900  | 2.79305900  | 0.02432100  | C                  | 2.94817700  | -2.77464200 | -0.02373200 |
| C             | 3.66931100  | 2.95486600  | 1.22831500  | C                  | 3.65759500  | -2.93469400 | -1.22223100 |
| C             | 3.48294500  | 3.31104800  | -1.17542600 | C                  | 3.47012500  | -3.29063600 | 1.17069500  |
| C             | 4.88995900  | 3.61850000  | 1.23432300  | C                  | 4.87456900  | -3.59917600 | -1.22953900 |
| H             | 3.25907100  | 2.55845500  | 2.15051100  | H                  | 3.24888500  | -2.53729600 | -2.14417600 |
| C             | 4.70254000  | 3.97656400  | -1.17393300 | C                  | 4.68588800  | -3.95733200 | 1.17072300  |
| H             | 2.92954200  | 3.18783000  | -2.09980500 | H                  | 2.91675900  | -3.16763600 | 2.09462400  |
| C             | 5.38693600  | 4.11840200  | 0.03195300  | C                  | 5.36614800  | -4.09805900 | -0.03108600 |
| H             | 5.45974000  | 3.75650600  | 2.14453800  | H                  | 5.44175600  | -3.73606400 | -2.14139300 |
| H             | 5.13069100  | 4.38476600  | -2.08070600 | H                  | 5.10978000  | -4.36593600 | 2.07917200  |
| C             | 2.95405700  | -2.79292700 | -0.02432800 | C                  | 2.94817700  | 2.77463200  | 0.02380800  |
| C             | 3.67025100  | -2.95322900 | -1.22799400 | C                  | 3.65760500  | 2.93475600  | 1.22229300  |
| C             | 3.48204300  | -3.31251300 | 1.17513900  | C                  | 3.47011000  | 3.29056500  | -1.17065200 |
| C             | 4.89083900  | -3.61696500 | -1.23394700 | C                  | 4.87457400  | 3.59924800  | 1.22955200  |
| H             | 3.26073500  | -2.55559100 | -2.14998400 | H                  | 3.24890700  | 2.53740600  | 2.14426400  |
| C             | 4.70159400  | -3.97811600 | 1.17370000  | C                  | 4.68586800  | 3.95727000  | -1.17072800 |
| H             | 2.92795800  | -3.19046200 | 2.09926400  | H                  | 2.91673700  | 3.16750900  | -2.09456900 |
| C             | 5.38687900  | -4.11846400 | -0.03185200 | C                  | 5.36613800  | 4.09806800  | 0.03106700  |
| H             | 5.46127100  | -3.75387600 | -2.14392000 | H                  | 5.44176900  | 3.73619100  | 2.14139300  |
| H             | 5.12903900  | -4.38749300 | 2.08027700  | H                  | 5.10974900  | 4.36582700  | -2.07920300 |
| N             | 6.68242900  | 4.82226000  | 0.03579400  | N                  | 6.65771000  | -4.80355100 | -0.03481800 |
| O             | 7.09700400  | 5.25183000  | -1.03900200 | O                  | 7.07091800  | -5.23345500 | 1.03199900  |
| O             | 7.26387900  | 4.93298100  | 1.11341400  | O                  | 7.23829900  | -4.91583800 | -1.10437900 |
| N             | 6.68230800  | -4.82242800 | -0.03563900 | N                  | 6.65769400  | 4.80357100  | 0.03474800  |
| O             | 7.09621900  | -5.25311200 | 1.03896800  | O                  | 7.07089500  | 5.23340300  | -1.03210100 |
| O             | 7.26436800  | -4.93213900 | -1.11303500 | O                  | 7.23829900  | 4.91590400  | 1.10429500  |

<sup>b</sup>Gen = 6-31G\*\* for H, C, B and O atoms, while Gen = LANL2DZ for I atoms

<sup>c</sup>Gen = 6-31+G\*\* for H, C, B and O atoms, while Gen = LANL2DZ for I atoms

**Table S4:** Optimized geometries of the molecules (Cartesian coordinates) of ground state for compound **3** at the B3LYP/Gen<sup>b</sup> at B3LYP and CAM-B3LYP/Gen<sup>c</sup> methods levels of theory, respectively.

| B3LYP/6-31G** |             |             |             | CAM-B3LYP/6-31+G** |             |             |             |
|---------------|-------------|-------------|-------------|--------------------|-------------|-------------|-------------|
| I             | -4.54624000 | 2.12307800  | 0.01222400  | I                  | 4.51834100  | 2.10467100  | -0.02031100 |
| I             | -4.54623800 | -2.12307200 | -0.01228800 | I                  | 4.51848400  | -2.10457900 | 0.02027800  |
| C             | 0.03465700  | 0.91877700  | 0.00646700  | C                  | -0.03771300 | 0.85513600  | -0.00961600 |
| C             | 0.03466200  | -0.91875300 | -0.00645800 | C                  | -0.03765400 | -0.85535300 | 0.00968500  |
| B             | -0.38394400 | -0.00759900 | 1.41176900  | B                  | 0.39941300  | -0.01325900 | -1.43138200 |
| H             | 0.37279300  | -0.01381600 | 2.31540600  | H                  | -0.37048000 | -0.02314900 | -2.32182900 |
| B             | -1.29682600 | 1.44518700  | 0.90445700  | B                  | 1.28691400  | 1.42722900  | -0.90328600 |
| H             | -1.16978000 | 2.43916800  | 1.52873600  | H                  | 1.14259600  | 2.42823700  | -1.51011800 |
| B             | -1.29516500 | 1.45549300  | -0.88613300 | B                  | 1.28482100  | 1.44442900  | 0.87354000  |
| H             | -1.16828300 | 2.45662100  | -1.49896000 | H                  | 1.14071400  | 2.45713300  | 1.46077900  |
| B             | -0.38394400 | 0.00761500  | -1.41177300 | B                  | 0.39944400  | 0.01307200  | 1.43144200  |
| H             | 0.37280900  | 0.01383900  | -2.31539700 | H                  | -0.37043000 | 0.02290900  | 2.32190600  |
| B             | -1.29516800 | -1.45549300 | 0.88614700  | B                  | 1.28490000  | -1.44455600 | -0.87350000 |
| H             | -1.16826100 | -2.45662200 | 1.49896600  | H                  | 1.14084900  | -2.45727000 | -1.46073600 |
| B             | -2.15704400 | -0.00877500 | 1.45124300  | B                  | 2.15626800  | -0.01456100 | -1.44464300 |
| H             | -2.74756100 | -0.01578200 | 2.47558800  | H                  | 2.75153300  | -0.02576500 | -2.46556700 |
| B             | -2.72375700 | 0.88908000  | 0.00525200  | B                  | 2.71053700  | 0.88672200  | -0.00877600 |
| B             | -2.15704400 | 0.00878100  | -1.45123200 | B                  | 2.15629900  | 0.01449300  | 1.44466300  |
| H             | -2.74758400 | 0.01578300  | -2.47556500 | H                  | 2.75158600  | 0.02573800  | 2.46557400  |
| B             | -1.29680800 | -1.44516600 | -0.90444700 | B                  | 1.28703100  | -1.42735500 | 0.90332600  |
| H             | -1.16976200 | -2.43914400 | -1.52873100 | H                  | 1.14279500  | -2.42837300 | 1.51016100  |
| B             | -2.72375200 | -0.88907800 | -0.00524700 | B                  | 2.71059800  | -0.88675200 | 0.00878300  |
| C             | 1.29514900  | 1.56788600  | 0.00922200  | C                  | -1.30192800 | 1.52115000  | -0.01452500 |
| C             | 1.29515700  | -1.56786400 | -0.00921000 | C                  | -1.30182300 | -1.52145700 | 0.01462300  |
| C             | 2.37954700  | 2.11746100  | 0.01039900  | C                  | -2.36772000 | 2.08846800  | -0.01686600 |
| C             | 2.37954900  | -2.11744800 | -0.01037200 | C                  | -2.36763500 | -2.08873700 | 0.01698100  |
| C             | 3.63796100  | 2.77471200  | 0.01028800  | C                  | -3.62366400 | 2.76528900  | -0.01889100 |
| C             | 4.31865600  | 3.03734400  | 1.21759100  | C                  | -4.33452700 | 2.95661600  | -1.21252000 |
| C             | 4.23972600  | 3.18608100  | -1.19744400 | C                  | -4.17552000 | 3.25766100  | 1.17262900  |
| C             | 5.54463900  | 3.68266300  | 1.21849300  | C                  | -5.55100400 | 3.61550700  | -1.21645400 |
| H             | 3.86939800  | 2.72989300  | 2.15639700  | H                  | -3.92131300 | 2.58232800  | -2.14314200 |
| C             | 5.46512100  | 3.83253300  | -1.19920900 | C                  | -5.39113600 | 3.91824600  | 1.17244700  |
| H             | 3.72882500  | 2.99448300  | -2.13554200 | H                  | -3.63770700 | 3.11906800  | 2.10457400  |
| C             | 6.14179900  | 4.09392900  | 0.00953400  | C                  | -6.09945600 | 4.10976300  | -0.02340300 |
| H             | 6.05495800  | 3.87378600  | 2.15887100  | H                  | -6.08933500 | 3.75016600  | -2.15013400 |
| H             | 5.91320200  | 4.14055400  | -2.14025700 | H                  | -5.80406400 | 4.28999100  | 2.10570500  |
| C             | 3.63795700  | -2.77470200 | -0.01024600 | C                  | -3.62367500 | -2.76537900 | 0.01894200  |
| C             | 4.31933000  | -3.03607300 | -1.21744100 | C                  | -4.33458000 | -2.95668800 | 1.21254900  |
| C             | 4.23902900  | -3.18735100 | 1.19739300  | C                  | -4.17555500 | -3.25764900 | -1.17260900 |
| C             | 5.54530600  | -3.68140500 | -1.21832400 | C                  | -5.55111500 | -3.61547300 | 1.21643300  |
| H             | 3.87060600  | -2.72762800 | -2.15617600 | H                  | -3.92134100 | -2.58249300 | 2.14319700  |
| C             | 5.46440700  | -3.83383500 | 1.19917100  | C                  | -5.39122900 | -3.91812700 | -1.17247800 |
| H             | 3.72760200  | -2.99672900 | 2.13540300  | H                  | -3.63770200 | -3.11908200 | -2.10453600 |
| C             | 6.14176700  | -4.09396800 | -0.00946200 | C                  | -6.09959000 | -4.10962800 | 0.02335000  |
| H             | 6.05616200  | -3.87153600 | -2.15861200 | H                  | -6.08947100 | -3.75013200 | 2.15009800  |
| H             | 5.91194600  | -4.14285800 | 2.14014900  | H                  | -5.80416800 | -4.28980500 | -2.10575800 |
| N             | 7.38724100  | 4.69605400  | 0.00605600  | N                  | -7.33365600 | 4.73333000  | -0.01994100 |
| N             | 7.38720300  | -4.69610800 | -0.00591600 | N                  | -7.33384400 | -4.73308700 | 0.01984000  |
| H             | 7.63590100  | 5.22697700  | -0.81556600 | H                  | -7.56661600 | 5.30312300  | 0.77854500  |
| H             | 7.69107900  | 5.12208000  | 0.86916300  | H                  | -7.67877400 | 5.08998400  | -0.89755200 |
| H             | 7.69151700  | -5.12123500 | -0.86929800 | H                  | -7.67900900 | -5.08974700 | 0.89743000  |
| H             | 7.63539400  | -5.22789700 | 0.81528700  | H                  | -7.56683900 | -5.30282700 | -0.77867400 |

<sup>b</sup>Gen = 6-31G\*\* for H, C, B and O atoms, while Gen = LANL2DZ for I atoms

<sup>c</sup>Gen = 6-31+G\*\* for H, C, B and O atoms, while Gen = LANL2DZ for I atoms

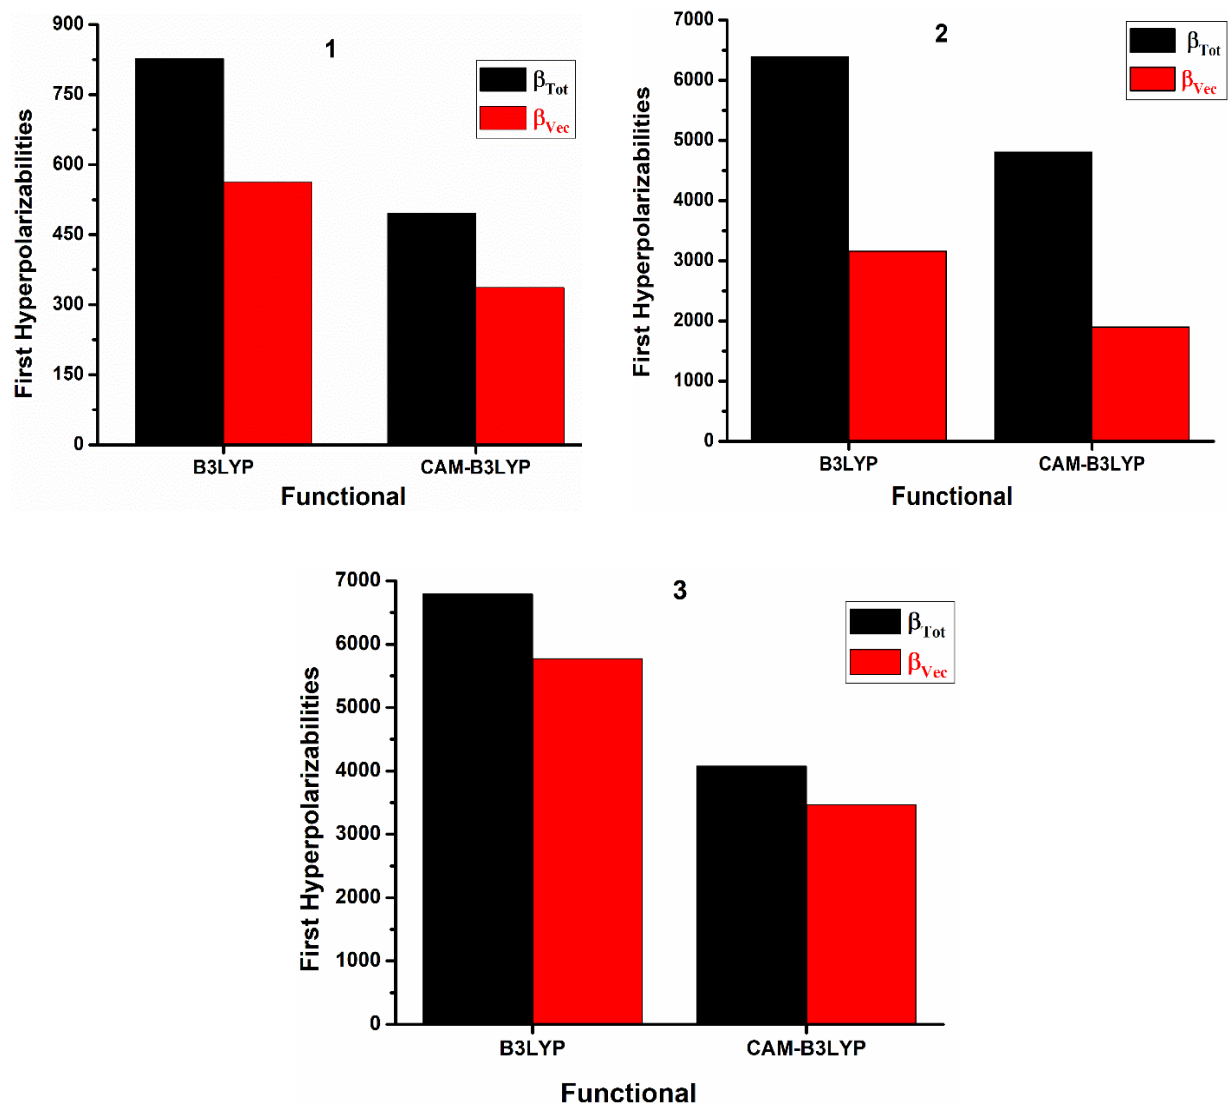

**Fig. S1.** The comparison of first hyperpolarizabilities ( $\beta_{tot}$ , and  $\beta_{vec}$  a. u.)<sup>a</sup> for compounds **1-3** at B3LYP and CAM-B3LYP levels of theory.

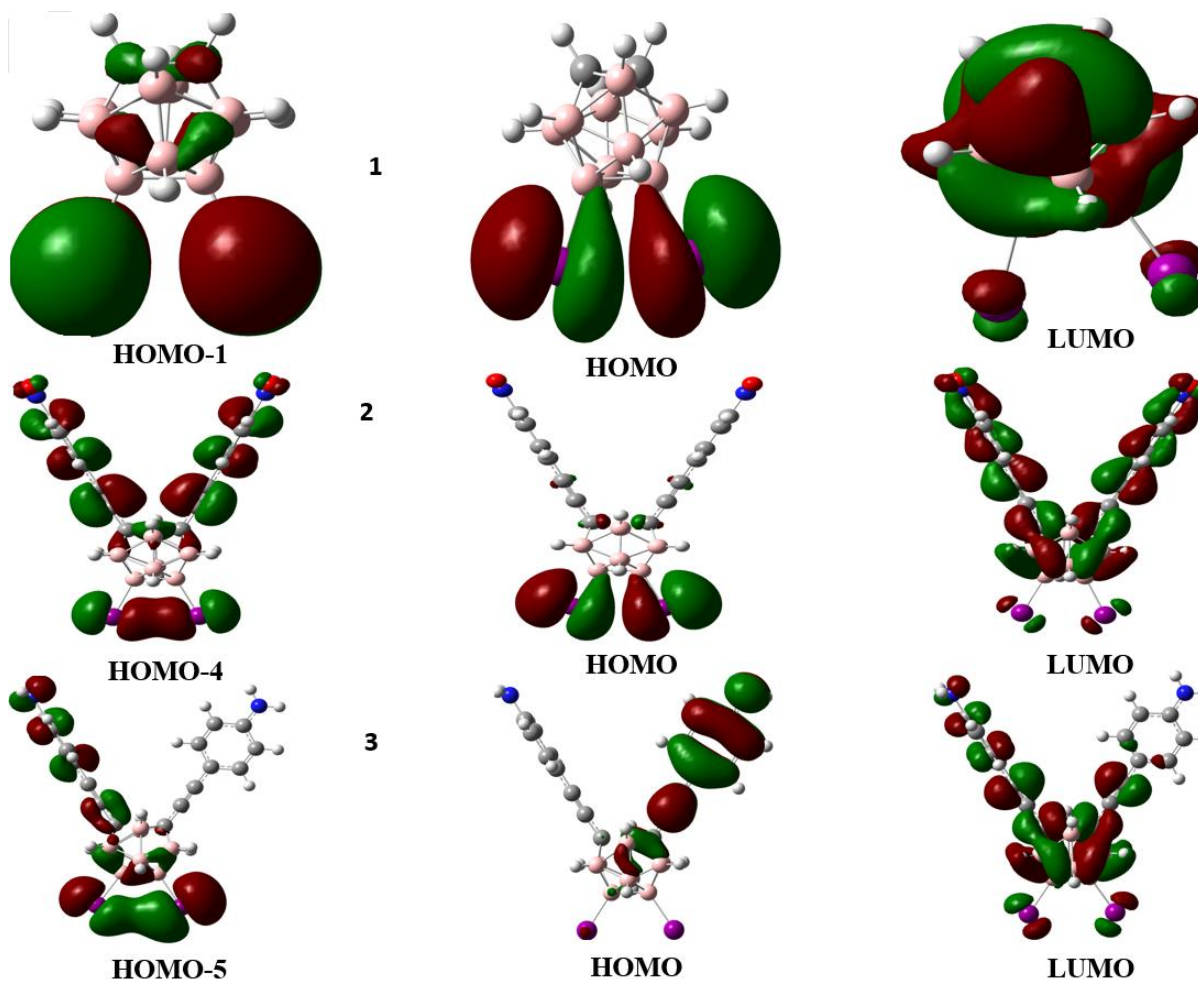

**Fig. S2:** Distribution patterns of the HOMOs and LUMOs of derivatives under study at the first excited states.
