# Supplementary figures and images for: Structural, Electronic and Nonlinear Optical Properties of Novel Derivatives of 9,12-Diiodo-1,2-dicarba-closo-dodecaborane: Density Functional Theory Approach
Source: publisher site journal article supplement (doi:10.1515/zna-2018-0123), 2018-07-03

# TOC

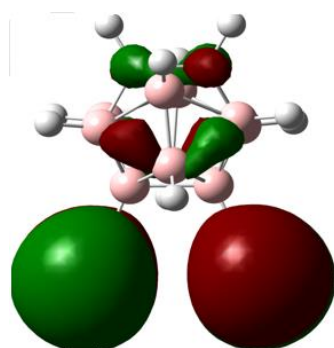

HOMO-1

1

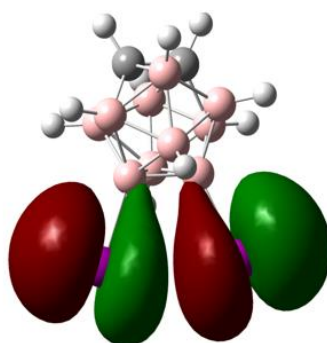

HOMO

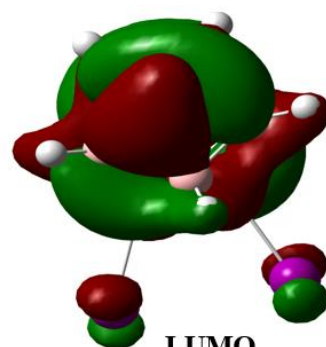

LUMO

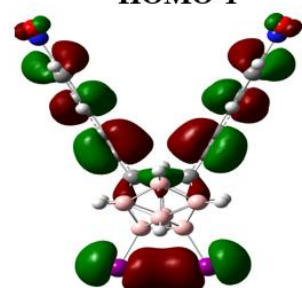

HOMO-4

2

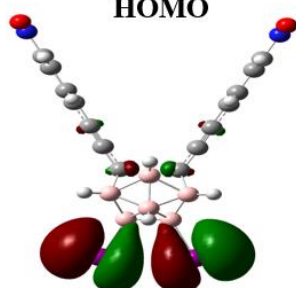

HOMO

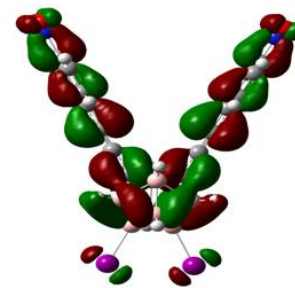

LUMO

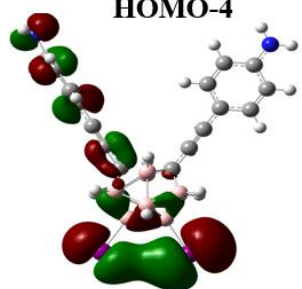

HOMO-5

3

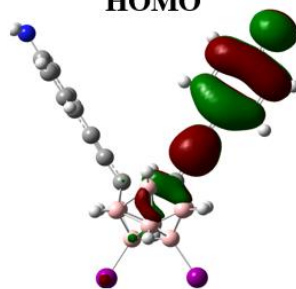

HOMO

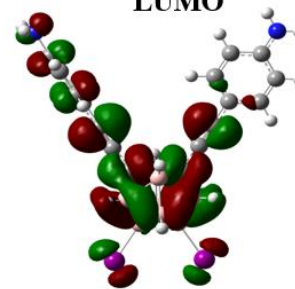

LUMO

Supplement: Supplementary file 2 [file zna-2018-0123_suppl.zip]
